# Supplementary material
Source: publisher site journal article supplement (https://www.spandidos-publications.com/2962/downloadSupplementary)

Figure S1. Effects of IL8 on IL1B expression and triple-negative breast cancer cell invasiveness. After serum starvation for 24 h, (A) HCC1143, (B) MDA231 and (C) HCC1806 cells were treated with 20 ng/ml IL8 for 24 h. Levels of IL1B mRNA expression were determined by reverse transcription-quantitative PCR. Results represent the mean  $\pm$  S.E.M of three independent experiments. \* $P$ <0.05 and \*\* $P$ <0.01. Con, control; NS, not significant.

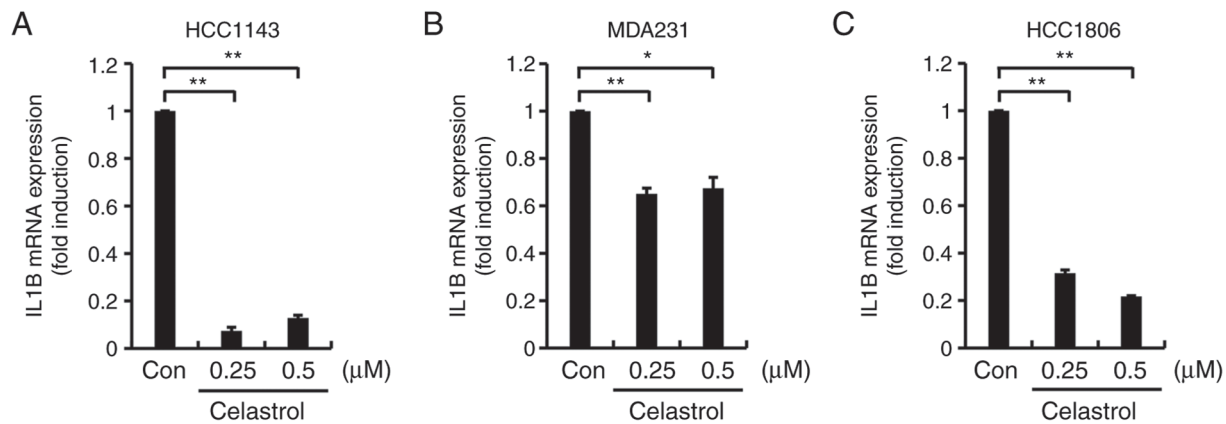

Figure S2. Celastrol decreases basal levels of IL1B expression in triple-negative breast cancer cells. After serum starvation for 24 h, (A) Hs578T and (B) HCC1143 cells were treated with celastrol at the indicated concentrations for 24 h. Levels of IL1B mRNA expression and cellular invasiveness were determined by reverse transcription-quantitative PCR. (C) After being seeded in the chambers, cells were treated with 20 ng/ml IL8 for 24 h. Invasive cells on the underside of the filter were photographed using a CK40 inverted microscope. Scale bars, 20  $\mu$ m. Results represent the mean  $\pm$  S.E.M of three independent experiments. \*\*P<0.01. Con, control; NS, not significant.

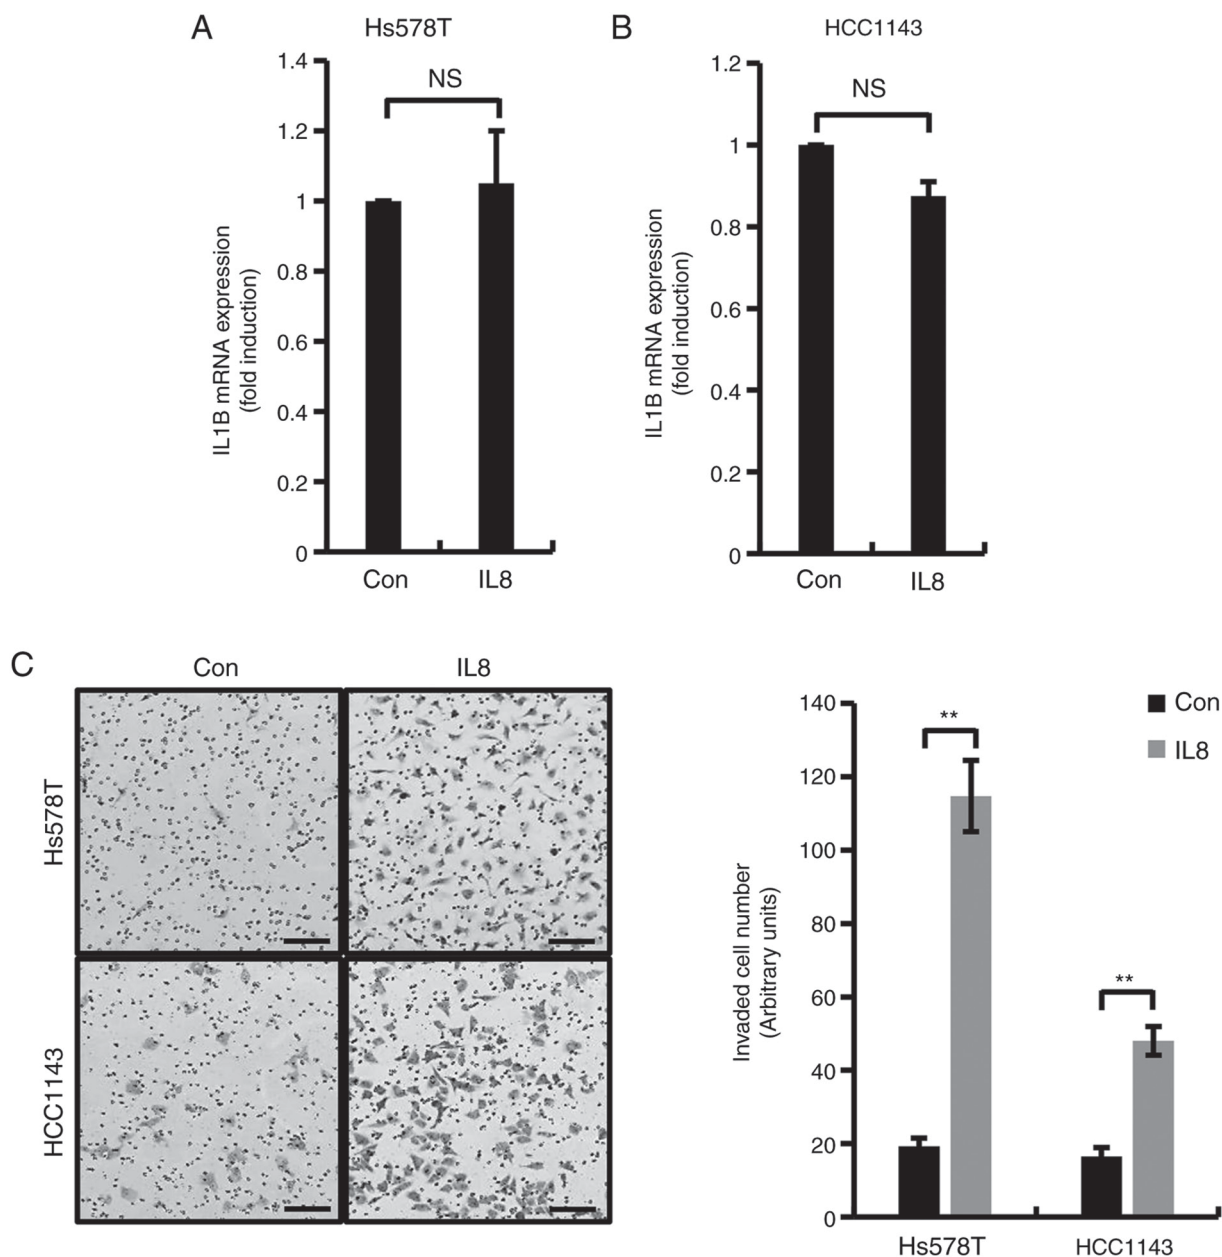

Supplement: Supplementary file 1 [file downloadSupplementary]
